# Supplementary material for: Solid-Phase Synthesis of N-Substituted Glycine Oligomers (α-Peptoids) and Derivatives
Source: Molecules. 2010 Aug 4;15(8):5282–335. doi: 10.3390/molecules15085282 (PMC6257730; doi:10.3390/molecules15085282)
Supplement: Supplementary file 1 [file molecules-15-05282-s001.xls]

## Sheet: Sheet1
Table 1S. Homo α-peptoid oligomer synthetic parameters
Ref. #	Resin	Loading	Vendor	Reaction	Amine	Amt/coupling	Concn.	Solvent	T/oC	Time	μW	Acid	Concn.	Amt/coupling	Solvent	Coupling	Solvent	Concn	Amount	T/oC	Time	Yield	Purity	Oligo	Instrument	Comments
	Type	mmol/g		scale /umol		mmol	mol/L			Mins	y/n		mol/L	mmol		Reagent		mol/L	mmol		Mins	%	%	length
TK
40	TentaGel HL12902, 75um	0.49	Rapp Polymere	750mg	benzyl
					primary		2	DMF		2x15s	y	ba	2		DMF	DIC	DMF	3.2			2x15s			9	domestic microwave 1kW
42; 43; 44; 45	TentaGel 140-170 um MB NH2	0.48-0.51		0.5		0.8								4.8					7.7						domestic microwave 1kW	C-Met is cleaved orthogonally with CNBr cyanogen bromide
22; 46	Rink amide MBHA		Novabiochem
	PS macrobeads 500um		Rapp Polymere	1g, 500																					domestic microwave 1kW
47; 46	Knorr amide MBHA	0.78	Novabiochem				2	DMF		2x15s	y	ba	2		DMF	DIC	DMF	3.2			2x15s			9	domestic microwave 1kW	C-Cys to conjugate fluorescein
48, 19	PS A-RAM macrobeads 500-560um	0.55	Rapp Polymere			1.5-3	1 to 2	DMF		2x15s	y	ba	2	2	DMF	DIC	DMF	3.2	3.2		2x15s			4	domestic microwave 1kW
49	Novasyn TG 90um	0.2-0.3																						6	domestic microwave 1kW
50, 51, 52	TentaGel 140-170 um MB NH2	0.51	Rapp Polymere	2g, 1000			2	DMF or DMSO	37	60-90	n	ba	2.8	4.2	DMF	DIC	DMF	3.2	4.8	37	40-60			6, 8	Rainin 12-channel peptide synthesizer	Added 2 C-terminal AA residues to facilitate trouble-free Edman sequencing
																									25mL peptide synthesis vessel (Chemglass)
53, 54	amine glass surface										n														digital photolithography	see text for description. >30000 features within a 1.5cm2 area of glass
55	Rink amide MBHA	0.73	Novabiochem	50mg, 37umol		2	1	DMF or DMSO	rt	120		ba	2	2	DMF	DIC	DMF	2	2	rt	2x30	70-81	25-70	9	Symphony automated peptide synthesizer
																									(Protein Technologies Inc)
									37	60		ba	2	2	DMF	DIC	DMF	2	2	37	45	70-90	63-80	9	NB Scientific Innova 4400 incubator shaker
KK
28, 33, 56, 37, 38	Rink amide		Novabiochem	60-70	primary alkyl	20eq	1	DMF	rt	20	n	ba	1.2	20 eq	DMF	DIC	neat		24 eq	rt	20		>98	7, 6	tempo, hydroxyquinoline
57	Rink amide	0.69	Novabiochem		aryl amine	20 eq	1.2	DMF	rt	960						DIC	neat		24 eq	rt	90			6	fritted syringe
	2-chlorotrityl resin	1.3	Novabiochem		aryl amine	20 eq	1.2	DMF	rt	960						DIC	neat		24 eq	rt	90			cyclo-6	fritted syringe	pyBOP/DIEA in DMF with 2.4umol/mL soln, of linear peptide o/n at rt for cyclization
34	Rink amide	0.69		70						960											90		>85	7	fritted syringe	azo submonomer amine. Reductive debromination of N-bromoacetamide to N-acetamide
35																								18
36	Rink amide			100mg	heterocyclic	2	2	DMF	35	60		ca	0.4	0.34	DMF	DIC	neat	0.2 mL		rt	20		56-95	5		low yield for hydroxyquinoline submonomer amine due to steric effects. Ca used after heterocyclic amine addition.
						1	1	DMF	rt	20	n	ba	0.4	0.34	DMF	DIC	neat	0.2 mL		rt	20			5
58, 59	Rink amide	0.49		50	phenylethyl	1	1	DMF	rt	40	n	ba	1.2	1	DMF	DIC	neat	0.2 mL		rt	20			13	Illiad 2 robotic workstation, Charybdis Instruments
RNZ
60	Rink amide	0.6	Novabiochem	60	primary	1.2	1.2	NMP	rt	60	n	ba	1.2	1	DMF	DIC				rt	20			7	Aapptec Apex 396	N-benzylguanidine sidechain is lost under cleavage conditions
61	Rink amide	0.57			histamine							ca												36	automated robot synthesizer	gives 2o amide at this position
62	TentaGel -NH2 280-320um	0.21
	TentaGel Rink amine	0.18		100mg, 18		1	1	NMP	35	20-120	n	ba	1.2	1	DMF	DIC	neat		1.2	35	20	39-69	50-95	5	Automated peptide synthesizer	cleavable hydrophilic linker, halogen tag for tandem MS analysis
																						18-24	58-72	10	Automated peptide synthesizer
7, 8	Rink amide	0.57	Novabiochem	50		1.3-1.7	1.5-2.0	NMP	35	40-90	n	ba	1.2	1.35	DMF	DIC	neat	0.2 mL	1.25	35	10			15		Ligation. DIC:bromoacetic acid 0.93:1.0 optimal ratio
	Sasrin resin																									C-terminal aldehyde
	2-Chlorotrityl resin	1.33	Novabiochem																							C-terminal thiol
63	same as refs. 182, 195						1	DMF	35	20												55-95	85-95	5		N-terminus conjugation
	except amine solution
64	Rink amide	0.57	Novabiochem	50	heterocyclic	1.7	2	NMP / DMF	35, 45	60-180	n	ba	0.4	0.34	DMF	DIC	DMF	2	0.4	35, 45	5	45-93	10 to 87	15	Automated peptide synthesizer	heterocyclic amines, anilines. Use of KI catalyst. Reduced haloacid concentration and reaction time
											n	ca	0.4	0.34	DMF	DIC	DMF	2	0.4	35, 45	5	71-92	78-95	15	Automated peptide synthesizer
65										60, 90	n	ba									2x15			15	Zymark robotic library synthesizer	a-chiral pendant group side chains
66	Rink amide			50	lipid amine - see text						n	ba	1.2	1	DMF	DIC	neat	0.2 mL		35	45			36		novel coupling for DMPE lipid amine - see text
67	Rink amide	0.47	Novabiochem	50		0.85	1	DMSO	35	40	n	ba	1.2	1	DMF	DIC	neat	0.2 mL		35	40		50-99	36
3, 68	Rink amide		Novabiochem	50, 100mg		1 mL	1 to 2	DMSO	rt	120	n	ba	0.6	0.5	DMF	DIC	DMF	3.2	0.64	rt	30x2	70	50	5		Methods Enzymol. Review
69	Rink amide		Advanced								n	ba													Symphony multiple peptide synthesizer
			Chemtech
2	Rink amide	0.45		50		2, 40 eq.	0.25-2.5	DMSO	rt	120	n	ba	0.7	0.6, 12 eq.	DMF	DIC	DMF	3.9	0.6, 13 eq.	rt	30x2	52-90	60-85	5
																						86	65	25		0.6M HOBt inclusion dropped yield from 75% to 5%
AM / FA
70	Rink amide AM RAM	0.79	Rapp Polymere	80		50 eq.	0.4	DMF	90	90s	y	ba	0.4	30 eq.	DMF	DIC	DMF	0.4	30 eq.	35	30s			5	CEM Discover monomode microwave 50mL R.B. flask	10 hrs. vs 4-5 days for 5-mers. Reagent concns. Lower than Blackwell uW procedure (194)
71	Rink amide MBHA	0.65	Novabiochem	160, 250 mg	amine with 1 eq. TEA	0.64		DMSO / DMF	rt	240	n	ca		0.96		DIC			0.48	rt	60		60-80	3	PP syringe with PE porous disk	DeClercq test for reaction completion
	BAL MBHA	0.7	Novabiochem	210, 300 mg	amine with 1 eq. TEA	0.84		DMSO / DMF	rt	240	n	ca		1.26		DIC			0.63	rt	60		60-80	3	PP syringe with PE porous disk	DeClercq test for reaction completion
72	Rink amide				amine with 1 eq. TEA	5 eq.		DMF	rt	300x2	n	ca		20 eq.	DCM	DIC	DCM		10 eq.	rt	60x2		84-98	3	PP syringe with PE porous disk	Kaiser or deClercq tests for acylation; Chloranil or de Clercq tests for amination.
	BAL resin				amine with 1 eq. TEA	5 eq.		DMF	rt	300x2	n	ca		20 eq.	DCM	DIC	DCM		10 eq.	rt	60x2		84-98	3	PP syringe with PE porous disk	Kaiser or deClercq tests for acylation; Chloranil or de Clercq tests for amination.
73	Rink amide AM RAM	0.7		280	amine with 1 eq. TEA	20 eq.		DM F	rt	180	n	ca		20 eq.	1:1 DMF:DCM	DIC				rt	30		70	3		Acylation & amination steps checked with chloranil test
74	Rink amide AM RAM	0.7		420	amine with 1 eq. TEA	5 eq., 2.1	5 mL	DMF	rt	180	n	ca		5 eq., 2.1	1:2 DMF:DCM	DIC	1:2 DMF:DCM	5 mL	5 eq.	rt	30x2		0.8	3	PP syringe with PE porous disk
75, 76	Rink amide AM RAM	0.7		490	amine with 1 eq. TEA	20 eq.		DMF	rt	180x2	n	ca chloride		20 eq.	DCM	TEA	DCM		20 eq.	0	90x2			3
AB
23, 77	Rink amide-MBHA LL (low loading)		Novabiochem		primary alkyl	20 eq.		DMF	rt	20	n	ba	1.2	20 eq.	DMF	DIC			24 eq.	rt	20			50	C S Bio 036 autopeptide synthesizer	50-mer
78	Rink amide MBHA		Anaspec																					20	C S Bio 036 autopeptide synthesizer	2,2,2-trifluoroethylamine
79	Rink amide		Novabiochem	250			1	NMP	rt	90-120	n	ba	1.2		DMF					rt	45			22
80, 81	Rink amide																							17	ABI 433A automated peptide synthesizer
82	2-chlorotrityl resin		Novabiochem		Nspe	10 eq.						1,2-13C-ba	0.6		DMF									9		ca (2 eq.) used with KI catalyst for first submonomer addition
83	Rink amide			250		24 eq.	1	NMP or DCM	rt		n	ba	1.2	200 eq.	DMF	DIC	neat	1 mL	44 eq.	rt	60	38-76		12 to 17	ABI 433A automated peptide synthesizer
84	Aldehyde resin																						32-91	6 to 24		C-substituted by reductive amination
HB
85	Rink amide	0.69		410	nitroaromatic amine	20 eq.	0.8	DMF	95	90s	y	ba	0.8	20 eq.	DMF	DIC	DMF	0.8	20 eq.	35	30		13-20	9	Milestone MicroSYNTH multimodal microwave	Deactivated nitroaromatic amines require 60oC for 60 mins for bromide displacement, uW synthesizer
86	Rink amide 100-200 mesh	0.75	Advanced	75 mg, 56	deactivated amines		1	DMF	95	90s	y	ba	2		DMF	DIC	DMF	2		35	30		56-93	5	Milestone MicroSYNTH multimodal microwave
			Chemtech																				52-69	9	Milestone MicroSYNTH multimodal microwave
DA
87	Rink amide	0.75		50 mg, 37	Triazole monomer		2	DMF	35	60	n	ba	0.4	0.25, 6.7 eq.	DMF	DIC	DMF	2	0.3, 8 eq.	35	20			8		1o amine.HCl with 1 eq. DIEA. 180 mins for first amination displacement.
88	Rink amide TentaGel	0.28		40		25 eq.	1 - 1.5	NMP or DMSO	rt	150	n	ba anhydride	0.6	0.6, 15 eq.	NMP					rt	40	10 to 30		10	Pierce fritted PP tube	phosphoric and sulfonamide amine submonomers for water solubility
MB
89, 90, 91, 92	Rink amide aminomethyl PS				Fmoc-N-R-Gly-OH	3 eq.			60	20	y					DIC / HOBt	DMF	0.1	3 eq.	60	20			7 to 22	Microwave assisted, 60oC coupling crucial to success
MD
93	Rink amide	0.45	Anaspec	23 mg, 10	amine with 1eq. TEA	0.2 mL	0.8	NMP	40	90	n	ca	0.5	0.2 mL	DMF	DIC	DMF	1	0.1 mL	rt	15	2 to 38	90-98	4	sonication for displacement reaction
94	Rink amide	0.45		23 mg, 10			neat or 1 or 2	neat or NMP	rt	30 - 180	n	ba	1	0.2mL or 0.25mL	DMF	DIC	DMF	1	0.2mL or 0.25mL	rt	20	5.4-35		6, 11, 16		glycosylated by click reaction
FdeR
95	2-chlorotrityl resin	1.55		460		3 mL	1	DMF	rt	30	n	ba	1.2	2.5mL	DCM	DIC	neat		600 uL	rt	20		68-80	6		Glycosyl amines
96	2-chlorotrityl resin	1.55	Fluka		N-Fmoc, N-benzyl-																	>90	>95	10
					oxyethylGly-OH
RMJL
97	Rink amide TentaGel				Fmoc synthesis																	8 to 12		10
98	TentaGel S RAM	0.24		250	Fmoc-N-R-Gly-OH	1																26-37		11	ABI 433A automated peptide synthesizer
N. Sewald 29	Rink amide AM				Fmoc-N-R-Gly-OH																			12		Sarcosine and N-propagylglycine monomers for glycosylated peptoids
R. Volkmer-Engert 99	Whatman 50 cellulose paper																							7	SPOT synthesis	bromophenol blue test
T. Rana 100	Rink amide MBHA			100	a-amino acids K, R,	1.0, 10 eq.		DMF		12 hr	n	ba	1	2.0, 20 eq.	DMF	DIC	neat		400 uL	rt	120			11
					Y, G with 1 eq. TEA
R. Rocchi 101	Rink amide MBHA	0.73		60	Fmoc-N-R-Gly-OH																	25-55		7	Advanced Chemtech 348-omega peptide synthesizer
H. Wenschuh 102, 103	Whatman 50 cellulose paper	0.5-0.9				2 uL	0.8 - 5	NMP or water/	rt	15x3	n	ba dnp ester	1	2 uL	NMP					rt	15x2	10 to 54	44-93	3, 6	ABIMED AutoSpot Robot	SPOT synthesis
		umol/cm2						0.05% Tween 20
K. Fukase 104	TentaGel S RAM 130um	0.25	Rapp Polymere	450		7		DMSO	rt	180 or 240	n	ba		4.5	DMF	DIC	DMF		4.5	rt	90
M.C. Pirrung 105, 106	Aminomethyl PS resin 500-550 um	0.95	Rapp Polymere	2850		3.2	1	DMSO	rt	720	n	ba	0.8	43	DMF	DIC	neat		43	rt	180
D.S. Brown 107	MAMP resin				NaI catalyst			NMP	80	960	n	ca chloride			THF	py				rt	960	70	90	1		Merrifield, Alpha-methoxyphenyl resin. Addition of amine first
Burgess 108	Rink amide MBHA	0.72		100mg, 72		42 eq.	2	DMF or DMSO	50	1	y	ba	2	42 eq.	DMF	DIC	DMF	2	42 eq.	50	1		99	3	CEM Discover monomode microwave
Notes
TK=Kodadek group
KK=Kirshenbaum group
RNZ=Zuckermann group
AM / FA = Messegeur and Albericio groups
AB=Barron group
HB=Blackwell group
DA=Appella group
MB=Bradley group
MD=Disney group
FdeR=Riccadris group
RMJL=Liskamp group
ba=bromacetic acid
ca=chloroacetic acid
